# Supplementary material for: Suppression of Peroxiredoxin 4 in Glioblastoma Cells Increases Apoptosis and Reduces Tumor Growth
Source: PubMed Central journal article supplement (PMC3419743; doi:10.1371/journal.pone.0042818), 2012-08-15

# Kim et al., Supplementary Figure S2

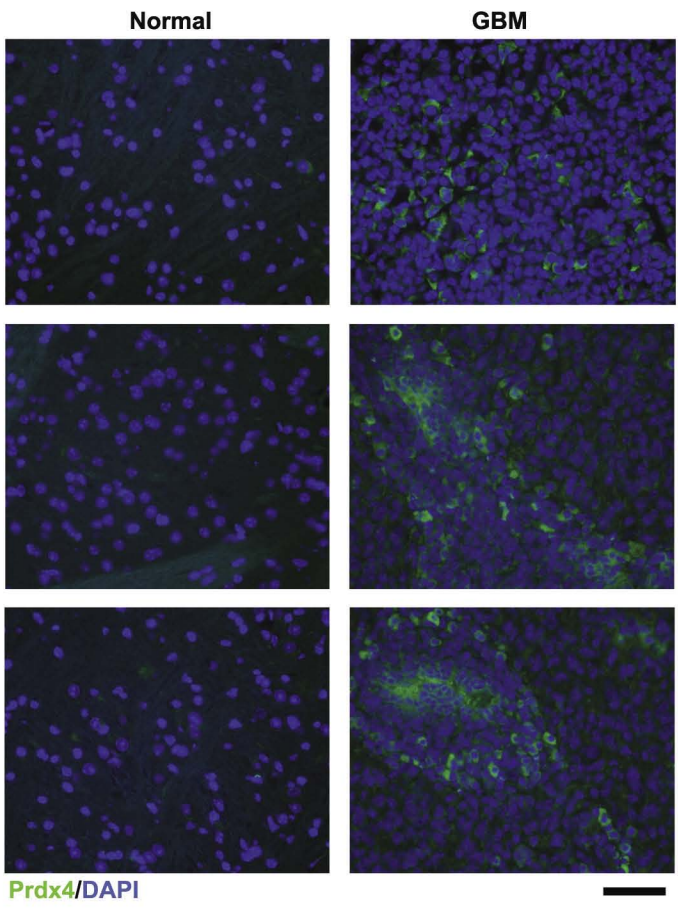

Supplement: pone.0042818.s002.pdf [file pone.0042818.s002.pdf]
