# Supplementary material for: Suppression of Peroxiredoxin 4 in Glioblastoma Cells Increases Apoptosis and Reduces Tumor Growth
Source: PubMed Central journal article supplement (PMC3419743; doi:10.1371/journal.pone.0042818), 2012-08-15
Supplement: pone.0042818.s009.pdf [file pone.0042818.s009.pdf]

**Supplementary Table S1.** Expression fold changes of 22 genes in the top-ranked network by IPA on human and mouse GBM gene expression analysis.

| Gene Symbol | <u>Human data</u>           |           | <u>Mouse data</u>        |           |
|-------------|-----------------------------|-----------|--------------------------|-----------|
|             | Fold change<br>(GBM/normal) | P value   | Fold change<br>(GBM/NSC) | P value   |
| G3BP2       | -1.793                      | 0.0000001 | -2.533                   | 0.0000576 |
| TXNIP       | 3.187                       | < 1e-07   | 2.529                    | 0.0000754 |
| PRDX4       | 5.037                       | < 1e-07   | 1.600                    | 0.0000993 |
| BTRC        | -1.860                      | < 1e-07   | -1.846                   | 0.0014054 |
| RPS6KA5     | -3.055                      | < 1e-07   | -1.882                   | 0.0014759 |
| TFPI        | 19.832                      | < 1e-07   | 9.603                    | 0.0018126 |
| GLI2        | 1.591                       | 0.0007228 | 2.684                    | 0.0018847 |
| NFKBIA      | 1.813                       | 0.0001141 | 1.628                    | 0.0041860 |
| ARFGAP3     | 2.164                       | < 1e-07   | 1.970                    | 0.0043959 |
| DAXX        | 1.677                       | 0.0000003 | 1.524                    | 0.0046179 |
| FSTL1       | 6.492                       | < 1e-07   | 2.842                    | 0.0047270 |
| HES1        | 2.622                       | 0.0000075 | 1.529                    | 0.0074982 |
| RAP1GAP     | -7.929                      | < 1e-07   | -1.986                   | 0.0103547 |
| XBP1        | 1.859                       | 0.0000061 | 1.510                    | 0.0119999 |
| EFNA1       | 2.207                       | 0.0000001 | 1.845                    | 0.0142324 |
| VCAN        | 9.724                       | < 1e-07   | 1.858                    | 0.0152890 |
| PEA15       | -1.846                      | 0.0000004 | -2.251                   | 0.0155068 |
| PSME1       | 1.940                       | 0.0000015 | 1.509                    | 0.0170793 |
| ZC3HAV1     | 3.298                       | < 1e-07   | 1.629                    | 0.0199848 |
| FBN1        | 3.138                       | 0.0005349 | 2.431                    | 0.0302093 |
| ROCK2       | -1.703                      | 0.0000025 | -4.323                   | 0.0325901 |
| TCF4        | 2.019                       | 0.0000361 | 1.569                    | 0.0356192 |
