# Supplementary material for: Suppression of Peroxiredoxin 4 in Glioblastoma Cells Increases Apoptosis and Reduces Tumor Growth
Source: PubMed Central journal article supplement (PMC3419743; doi:10.1371/journal.pone.0042818), 2012-08-15
Supplement: pone.0042818.s010.pdf [file pone.0042818.s010.pdf]

**Supplementary Table S2.** Sequences of qRT-PCR primers and shRNAs.

| Purpose/species | Name          | Sequence                      |
|-----------------|---------------|-------------------------------|
| qRT-PCR/mouse   | Gapdh F       | 5' -CGTCCCGTAGACAAAATGGT-3'   |
| "               | Gapdh R       | 5' -TTGATGGCAACAATCTCCAC-3'   |
| "               | Prdx4 F       | 5' -CGGATCACTCCCTGCATCTA-3'   |
| "               | Prdx4 R       | 5' -TGAGCTCCTTGAATTCTCCG-3'   |
| qRT-PCR/human   | GAPDH F       | 5' -AAGGTGAAGGTCGGAGTCAA-3'   |
| "               | GAPDH R       | 5' -AATGAAGGGGTCATTGATGG-3'   |
| "               | PRDX4 F       | 5' -TTGGCGACAGACTTGAAGAA-3'   |
| "               | PRDX4 R       | 5' -ATCCTTATTGGCCCAAGTCC-3'   |
| shRNA/mouse     | Prdx4 shRNA 1 | 5' -GGAAGGAACAGCTGTGATTAA-3'  |
| "               | Prdx4 shRNA 2 | 5' -GAAGTATTTTCGACAAGCTAAA-3' |
| shRNA/human     | PRDX4 shRNA   | 5' -GAAACCTGGTAGTGAAACAAT-3'  |
